# Supplementary material for: Enhanced Health Facility Surveys to Support Malaria Control and Elimination across Different Transmission Settings in the Philippines
Source: PubMed Central journal article supplement — Am J Trop Med Hyg. 2021 Jan 18;104(3):968–78. doi: 10.4269/ajtmh.20-0814 (PMC7941801; doi:10.4269/ajtmh.20-0814), 2021-01-18
Supplement: tpmd200814.SD1.pdf [file tpmd200814.SD1.pdf]

**Supplemental Table S1.** Participants by province, fever, and gender for all study sites

|                                   | <b>Bataan</b>   | <b>Occidental Mindoro</b> | <b>Palawan</b>  |               |
|-----------------------------------|-----------------|---------------------------|-----------------|---------------|
|                                   |                 |                           | <b>Year 1</b>   | <b>Year 2</b> |
| <b>Total Participants</b>         | n = 896         | n = 1772                  | n = 5746        | n = 1135      |
| Patients (%)                      | 623<br>(69.5)   | 1,549<br>(87.4)           | 4,391<br>(76.4) | 976<br>(86.0) |
| Companion (%)                     | 273<br>(30.5)   | 223<br>(12.6)             | 1,355<br>(23.6) | 159<br>(14.0) |
| <b>Fever (%)</b>                  |                 |                           |                 |               |
| Yes (%)                           | 66<br>(7.4)     | 76<br>(4.3)               | 1,647<br>(28.7) | 406<br>(35.8) |
| No (%)                            | 830<br>(92.6)   | 1,696<br>(95.7)           | 4,071<br>(70.8) | 728<br>(64.1) |
| No data (%)                       | -               | -                         | 28<br>(0.5)     | 1<br>(0)      |
| <b>Gender (%)</b>                 |                 |                           |                 |               |
| Male (%)                          | 255<br>(28.5)   | 617<br>(34.8)             | 2,448<br>(42.1) | 528<br>(46.5) |
| Female (%)                        | 641<br>(71.5)   | 1,155<br>(65.8)           | 3,298<br>(56.8) | 605<br>(53.3) |
| No data (%)                       | -               | -                         | 0<br>(1.1)      | 2<br>(0.2)    |
| <b>Age in Years, Median (IQR)</b> | 26<br>(11 – 39) | 28<br>(15 – 42)           | 14<br>(5 – 32)  | 9<br>(3 – 26) |

**Supplemental Table S2.** Malaria infection by participant category (patient or companion) for all study sites

| Study Sites                    | Microscopy        |                  | RDT               |                  | PCR               |                    |
|--------------------------------|-------------------|------------------|-------------------|------------------|-------------------|--------------------|
|                                | + / N*            | % (95% CI)       | + / N*            | % (95% CI)       | + / N*            | % (95% CI)         |
| <b>Palawan (Year 1)</b>        | <b>300</b> / 5386 | 5.6 (5.0 – 6.2)  | <b>314</b> / 5746 | 5.5 (4.9 – 6.1)  | <b>613</b> / 5722 | 10.7 (9.9 – 11.5)  |
| <b>1. 23 HFs</b>               | <b>176</b> / 3922 | 4.5 (3.9 – 5.2)  | <b>196</b> / 4233 | 4.6 (4.0 – 5.3)  | <b>435</b> / 4217 | 10.3 (9.4 – 11.3)  |
| Patient                        | <b>148</b> / 2912 | 5.1 (4.3 – 5.9)  | <b>170</b> / 3170 | 5.4 (4.6 – 6.2)  | <b>312</b> / 3155 | 9.9 (8.9 – 11.0)   |
| Companion                      | <b>28</b> / 1010  | 2.8 (1.9 – 4.0)  | <b>26</b> / 1063  | 2.4 (1.7 – 3.6)  | <b>123</b> / 1062 | 11.6 (9.8 – 13.6)  |
| <b>2. 4 HFs</b>                | <b>124</b> / 1464 | 8.5 (7.2 – 10.0) | <b>118</b> / 1513 | 7.8 (6.6 – 9.3)  | <b>178</b> / 1505 | 11.8 (10.3 – 13.6) |
| Patient                        | <b>107</b> / 1183 | 9 (7.5 – 10.8)   | <b>98</b> / 1221  | 8.0 (6.6 – 9.7)  | <b>126</b> / 1213 | 10.4 (8.8 – 12.2)  |
| Companion                      | <b>17</b> / 281   | 6.0 (3.8 – 9.5)  | <b>20</b> / 292   | 6.8 (4.5 – 10.3) | <b>52</b> / 292   | 17.8 (13.8 – 22.6) |
| <b>Palawan (Year 2; 4 HFs)</b> | <b>91</b> / 1102  | 8.3 (6.8 – 10.0) | <b>99</b> / 1135  | 8.7 (7.2 – 10.5) | <b>228</b> / 1135 | 20.1 (17.9 – 22.5) |
| Patient                        | 84 / 951          | 8.8 (7.2 – 10.8) | <b>88</b> / 976   | 9.0 (7.4 – 11.0) | <b>190</b> / 976  | 19.5 (17.1 – 22.1) |
| Companion                      | <b>7</b> / 151    | 4.6 (2.3 – 9.3)  | <b>11</b> / 159   | 6.9 (3.9 – 12.0) | <b>38</b> / 159   | 23.9 (17.9 – 31.1) |
| <b>Occidental Mindoro</b>      | 0 / 1640          | -                | <b>1</b> / 1772   | 0.1 (0 – 0.3)    | 0 / 1772          | -                  |
| Patient                        | 0 / 1427          | -                | <b>1</b> / 1549   | 0.1 (0 – 0.4)    | 0 / 1549          | -                  |
| Companion                      | 0 / 213           | -                | 0 / 223           | -                | 0 / 223           | -                  |
| <b>Bataan</b>                  | 0 / 874           | -                | N/A               | -                | 0 / 874           | -                  |
| Patient                        | 0 / 609           | -                | N/A               | -                | 0 / 609           | -                  |
| Companion                      | 0 / 265           | -                | N/A               | -                | 0 / 265           | -                  |

\*denominator for each depends on analyzable samples processed

HF's – health facilities

**Supplemental Table S3.** *Plasmodium* species by malaria microscopy and PCR for Palawan

| Malaria Species         | Year 1          |      |                 |      | Year 2         |      |                 |      |
|-------------------------|-----------------|------|-----------------|------|----------------|------|-----------------|------|
|                         | Microscopy      |      | PCR             |      | Microscopy     |      | PCR             |      |
|                         | +               | %    | +               | %    | +              | %    | +               | %    |
| <i>P. falciparum</i>    | 223             | 74.3 | 306             | 49.9 | 70             | 76.9 | 126             | 55.3 |
| <i>P. vivax</i>         | 54              | 18.0 | 75              | 12.2 | 10             | 11.0 | 27              | 11.8 |
| <i>P. malariae</i>      | 4               | 1.3  | 29              | 4.7  | 3              | 3.3  | 3               | 1.3  |
| <i>P. ovale</i>         | 0               | -    | 2               | 0.3  | 0              | 0.0  | 0               | 0.0  |
| <i>P. knowlesi</i>      | 0               | -    | 1               | 0.2  | 0              | 0.0  | 0               | 0.0  |
| Mixed Infections        | 18 <sup>a</sup> | 6.0  | 49 <sup>b</sup> | 8.0  | 4 <sup>c</sup> | 4.4  | 22 <sup>d</sup> | 9.6  |
| <i>Plasmodium</i> spp.* | 1               | 0.3  | 151             | 24.6 | 4              | 4.4  | 50              | 21.9 |

a - *P. falciparum*/*P. vivax* (16) and *P. falciparum*/*P. malariae* (2)  
b - *P. falciparum*/*P. vivax* (15), *P. falciparum*/*P. malariae* (13), *P. falciparum*/*P. ovale* (1), *P. vivax*/*P. malariae* (1), *P. falciparum*/*P. vivax*/*P. malariae* (1), *P. falciparum*/*P. malariae*/*P. ovale* (1)  
c - *P. falciparum*/*P. vivax* (3) and *P. falciparum*/*P. malariae* (1)  
d - *P. falciparum*/*P. vivax* (15), *P. falciparum*/*P. malariae* (4), *P. vivax*/*P. malariae* (1), *P. falciparum*/*P. vivax*/*P. malariae* (2)  
\* Quantity not sufficient (QNS) for speciation
